# Supplementary material for: Symmetry breaking polymerization: one-pot synthesis of plasmonic hybrid Janus nanoparticles
Source: Royal Society of Chemistry journal article supplement (doi:10.1039/c5nr01999k), 2015-01-01
Supplement: c5nr01999k1.pdf [file c5nr01999k1.pdf]

**Electronic Supplementary Information**

**Symmetry breaking polymerization: one-pot synthesis of hybrid Janus nanoparticles**

*Yanming Wang<sup>a</sup>, Tao Ding<sup>a,b\*</sup>, Jeremy J. Baumberg<sup>b</sup>, and Stoyan K. Smoukov<sup>a\*</sup>*

<sup>a</sup> Department of Materials Science and Metallurgy, 27 Charles Babbage Road, University of Cambridge, CB3 0FS , UK

<sup>b</sup> Nanophotonic Centre, Cavendish Laboratory, University of Cambridge, CB3 0HE , UK

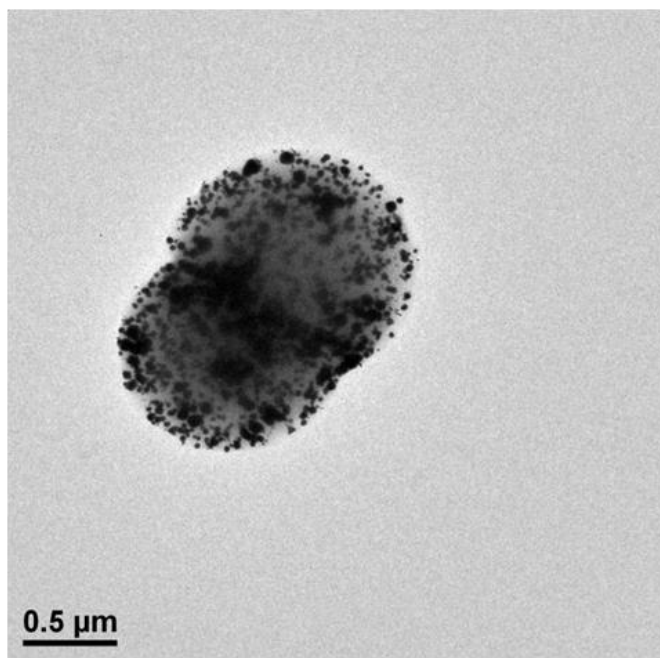

Figure S1. The  $\text{HAuCl}_4$  initiated polymerization of DVB without the presence of PVP

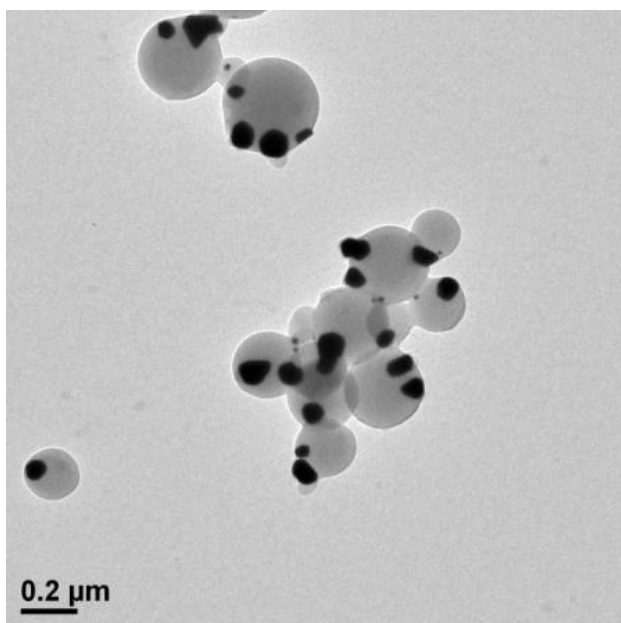

Figure S2. TEM image of Au-PDVB asymmetric nanoparticles synthesized at 25 °C.
